# Supplementary material for: Evidence-guided approach to portfolio-guided teaching and assessing communications, ethics and professionalism for medical students and physicians: a systematic scoping review
Source: HighWire-hosted journal article supplement (doi:10.1136/bmjopen-2022-067048), 2023-03-01
Supplement: bmjopen-2022-067048supp004_data_supplement.pdf [file bmjopen-2022-067048supp004_data_supplement.pdf]

## Appendix C

## Portfolio Content (Competencies Assessed and Assessment Modalities)

| Subthemes                    | Content                                                                                                                                                                                                                                                                                                                                                                                                                                                                                                                                                                                                                                                                                                                                                                                                                                                                                                                                                                                                                                                                                                                                                                                                                                                                                                                                                                |                                                                                                                                                                                                                                                                                                                                                                                                                                                                                                                                                                                                                                                                                                                                                                                                                        |                                                                                                                                                                                                                                                                                                                                                                                                                                                                                                                                                                                                                                                                                                                                                                                                                                                                        |
|------------------------------|------------------------------------------------------------------------------------------------------------------------------------------------------------------------------------------------------------------------------------------------------------------------------------------------------------------------------------------------------------------------------------------------------------------------------------------------------------------------------------------------------------------------------------------------------------------------------------------------------------------------------------------------------------------------------------------------------------------------------------------------------------------------------------------------------------------------------------------------------------------------------------------------------------------------------------------------------------------------------------------------------------------------------------------------------------------------------------------------------------------------------------------------------------------------------------------------------------------------------------------------------------------------------------------------------------------------------------------------------------------------|------------------------------------------------------------------------------------------------------------------------------------------------------------------------------------------------------------------------------------------------------------------------------------------------------------------------------------------------------------------------------------------------------------------------------------------------------------------------------------------------------------------------------------------------------------------------------------------------------------------------------------------------------------------------------------------------------------------------------------------------------------------------------------------------------------------------|------------------------------------------------------------------------------------------------------------------------------------------------------------------------------------------------------------------------------------------------------------------------------------------------------------------------------------------------------------------------------------------------------------------------------------------------------------------------------------------------------------------------------------------------------------------------------------------------------------------------------------------------------------------------------------------------------------------------------------------------------------------------------------------------------------------------------------------------------------------------|
|                              | Communication                                                                                                                                                                                                                                                                                                                                                                                                                                                                                                                                                                                                                                                                                                                                                                                                                                                                                                                                                                                                                                                                                                                                                                                                                                                                                                                                                          | Ethics                                                                                                                                                                                                                                                                                                                                                                                                                                                                                                                                                                                                                                                                                                                                                                                                                 | Professionalism                                                                                                                                                                                                                                                                                                                                                                                                                                                                                                                                                                                                                                                                                                                                                                                                                                                        |
| <b>Competencies Assessed</b> | <ul style="list-style-type: none"> <li>• “Effective” communication (65, 67, 68, 81, 86, 107, 127, 131-133)</li> <li>• Professional behaviour and moral reasoning (71)</li> <li>• Systems awareness and team-based care (71)</li> <li>• Continuous learning and quality improvement (71)</li> <li>• Patient-centred medical care (71)</li> <li>• Teamwork (70)</li> </ul> <p>Oral communication skills</p> <ul style="list-style-type: none"> <li>• Attentive, active listening (84, 139, 140)</li> <li>• Explanation, information giving (127, 139)</li> <li>• History taking (93)</li> <li>• Consultation (141)</li> <li>• Breaking bad news (24, 139)</li> <li>• Shared decision making (142)</li> <li>• Empathetic communication (142)</li> <li>• Taking history and clinical examination (84, 93)</li> <li>• Discerning appropriate language to ensure patient understands (24, 127)</li> <li>• Conflict management (139)</li> <li>• Adaptability to different settings (67)</li> </ul> <p>Written communication skills</p> <ul style="list-style-type: none"> <li>• Proper grammar, spelling, logical and coherent structure (103)</li> <li>• Patient cases (93)</li> <li>• Scientific research (93)</li> </ul> <p>Communication with:</p> <ul style="list-style-type: none"> <li>• Patients (24, 68, 84, 93, 127, 139, 143)</li> <li>• Children (127)</li> </ul> | <ul style="list-style-type: none"> <li>• Ethics in interprofessional practice (24, 67, 86, 128, 130, 145, 146)</li> <li>• Doctor-patient relationship (81, 141, 145)</li> <li>• Values/ ethics (67, 70, 86, 146)</li> <li>• Ethical and legal responsibilities (65, 86)</li> <li>• Moral reasoning (89)</li> <li>• Ethics is assessed as a component of professionalism (85, 87, 88)</li> <li>• Empathy (84)</li> <li>• Showing respect and commitment (84)</li> <li>• Respect for privacy (84)</li> <li>• How to express ethical views appropriately (82)</li> <li>• Identifying unethical moments of practice and grey areas (85, 89, 90)</li> </ul> <p>Reflection:</p> <ul style="list-style-type: none"> <li>• Quality of student's reflections (82, 84, 87)</li> <li>• Authenticity of reflection (87)</li> </ul> | <ul style="list-style-type: none"> <li>• Learning from clinical experience (24, 81)</li> <li>• Working in groups/ teamwork (24, 67, 70, 81, 86, 128, 130, 134, 145)</li> <li>• Doctor-patient relationship (81, 141, 145)</li> <li>• Becoming a doctor/roles and responsibilities (81, 86, 128, 130, 134, 145, 146)</li> <li>• Patient care (67, 70, 128, 130)</li> <li>• Continuous learning (67, 70)</li> <li>• Values/ ethics (67, 70, 86, 146)</li> <li>• Interpersonal skills/ effective Communication, (24, 67, 128, 145, 146)</li> </ul> <p>Reflection:</p> <ul style="list-style-type: none"> <li>• Clinical experience (81)</li> <li>• Teaching (81)</li> <li>• Learning needs in becoming a doctor</li> <li>• Strengths and developmental areas (65, 86)</li> <li>• Understanding of concepts addressed (86)</li> <li>• Dilemmas and doubts (133)</li> </ul> |

|                                                |                                                                                                                                                                                                                                                                                                                                                                                                                                                                                                                                                                                                                                                                                                                                                                                                                                                                                                                                                                                                                                                                                                                                                                                                                                                                                                                                                                                                                                                                                                                                                                                                                                                                                         |  |  |
|------------------------------------------------|-----------------------------------------------------------------------------------------------------------------------------------------------------------------------------------------------------------------------------------------------------------------------------------------------------------------------------------------------------------------------------------------------------------------------------------------------------------------------------------------------------------------------------------------------------------------------------------------------------------------------------------------------------------------------------------------------------------------------------------------------------------------------------------------------------------------------------------------------------------------------------------------------------------------------------------------------------------------------------------------------------------------------------------------------------------------------------------------------------------------------------------------------------------------------------------------------------------------------------------------------------------------------------------------------------------------------------------------------------------------------------------------------------------------------------------------------------------------------------------------------------------------------------------------------------------------------------------------------------------------------------------------------------------------------------------------|--|--|
|                                                | <ul style="list-style-type: none"> <li>Family (68, 84, 139, 144)</li> <li>Colleagues, interprofessional team (24, 68, 84, 93, 130, 139)</li> <li>Public (68)</li> </ul>                                                                                                                                                                                                                                                                                                                                                                                                                                                                                                                                                                                                                                                                                                                                                                                                                                                                                                                                                                                                                                                                                                                                                                                                                                                                                                                                                                                                                                                                                                                 |  |  |
| <b>Assessment Modalities (Portfolio items)</b> | <p>Formative only (67, 84, 87, 92, 119, 126, 130, 146)</p> <p>Summative only (65, 70, 71, 81-83, 87, 104, 116, 131, 134)</p> <p>Both formative and summative (24, 67, 83, 86, 87, 117, 122, 128, 130, 134)</p> <p>MCQs (65, 68, 87, 95, 126, 141, 143, 144, 146)</p> <p>OSCEs (65, 67, 70, 71, 87, 126, 127, 130, 141, 143, 144, 146)</p> <p>Essays – topical (67, 81, 93, 126)</p> <p>Mini clinical examination exercise (Mini-CEX) (65, 67, 70, 87, 93, 130, 139, 143, 146)</p> <p>Medical/patient presentations/research (67, 68, 80, 86, 93, 121, 126, 129)</p> <p>Workplace-based clinical (67, 70, 71, 80, 83, 93, 107, 112, 122, 126, 127, 130, 139, 143)</p> <p>Case-based discussions, summaries (65, 68, 83, 85, 89, 92, 129)(19)(81, 129) (83, 126, 130)</p> <p>Simulated patient assessment (65, 68, 84, 103, 112)</p> <p>Team-based assessment (65, 83, 86, 93)</p> <p>Logbooks/ Portfolio interview (65, 67, 68, 70, 81-85, 87, 88, 103, 121, 126) (67, 121, 126)</p> <p>Peer evaluation (67, 70, 71, 80, 85, 93, 107, 126, 127)</p> <p>Faculty evaluation (67, 68, 70, 71, 80, 81, 83-86, 117, 126, 131, 147)</p> <p>Feedback reports (75, 77, 80, 86, 91, 93, 109, 112, 122, 126, 130, 134, 139, 143) – multisource feedback (75, 77, 81, 82, 85, 86, 91, 93, 103, 109, 127, 130)</p> <p>Self-assessment/appraisal (67, 68, 80, 82, 93, 104, 126, 130, 134)</p> <p>Self-reflections – written/video/diaries (65, 67, 68, 71, 80-83, 85, 87, 88, 90, 93, 103, 107, 121, 127-130)</p> <p>Learning plans and contracts (67, 68, 71, 80-83, 86, 92, 93, 103, 133)</p> <p>Letters of recommendation (65, 81, 103)</p> <p>Curriculum vitae (65, 67, 70, 83, 86, 122, 126)</p> |  |  |
